# Supplementary material for: Active Living with Furry Friends: The Influence of Dogs on Physical Activity Levels in Children and Adolescents - A Systematic Review
Source: Research Square preprint supplement (doi:10.21203/rs.3.rs-7375995/v1), 2025-11-11
Supplement: Supplementary file 1 [file d1bd0ae7085f3ac4a1f90d38.docx]

**SUPPLEMENTARY MATERIALS.**

**Table S1.** Database search strategy.

**Table S2.** Summary of the methodological quality of cross-sectional and longitudinal studies.

**Table S3.** PEDro scale

**Table S4.** Axis scale

**Table S5.** PRISMA-S checklist.

**Table S6.** Excluded studies with reasons for exclusion.

**Table S1.** Database search strategy

| **Search set for Medline (via PubMed)** |
| --- |
| ((dog ownership OR walking dog OR dog walkers OR human-dog) AND (children OR schoolchildren OR adolescents)) AND (physical activity OR health OR exercise) |
| **Total results:** 431 |
| Search set for ScienceDirect |
| ((dog ownership OR walking dog OR dog walkers) AND (children OR schoolchildren OR adolescents)) AND (physical activity OR exercise)  ***Research articles** |
| **Total results:** 6.528 |
| **Search set for Cochrane** |
| ((dog ownership OR walking dog OR dog walkers OR human-dog) AND (children OR schoolchildren OR adolescents)) AND (physical activity OR health OR exercise) |
| **Total results:** 19 |
| **Search set for WOS** |
| ((dog ownership OR walking dog OR dog walkers OR human-dog) AND (children OR schoolchildren OR adolescents)) AND (physical activity OR health OR exercise) |
| **Total results:** 525 |
| **Total articles: 7,503** |

**Table S2.** Summary of the methodological quality of cross-sectional and longitudinal studies.

| **Overall criteria compliance** | | | | | |
| --- | --- | --- | --- | --- | --- |
| **Study, Year** | **POS** | **NEG** | **NC** | **Percentage reached** | **Quality** |
| Ham and Epping. 2006 | 11 | 9 | 0 | 55% | Medium |
| Salmon et al. 2010 | 15 | 5 | 0 | 75% | High |
| Owen et al. 2010 | 11 | 9 | 0 | 55% | Medium |
| Sirard et al. 2011 | 15 | 5 | 0 | 75% | High |
| Christian et al. 2013 | 15 | 5 | 0 | 75% | High |
| Westgarth et al. 2013 | 15 | 5 | 0 | 75% | High |
| Christian et al. 2014 | 12 | 8 | 0 | 60% | Medium |
| Martin et al. 2015 | 14 | 6 | 0 | 70% | Medium |
| Engelberg et al. 2016 | 14 | 6 | 0 | 70% | Medium |
| Gadomski et al. 2017 | 13 | 7 | 0 | 65% | Medium |
| Veitch et al. 2019 | 15 | 5 | 0 | 75% | High |
| Westgarth et al. 2019 | 13 | 7 | 0 | 66% | Medium |
| Christian et al. 2022 | 16 | 4 | 0 | 80% | High |
| Westgarth et al. 2017 | 12 | 8 | 0 | 60% | Medium |
| Adams et al. 2024 | 19 | 1 | 0 | 95% | High |

**Abbreviations.** POS: positive; NEG: negative; NC: not know/comment.

**Table S3.** PEDro Scale to evaluate RCT study

| **Study** | **Random allocation** | **Concealed allocation** | **Groups similar at baseline** | **Assessor blinding** | **Subject blinding** | **Therapist blinding** | **Less than 15% dropouts** | **Intention-to-treat analysis** | **Between-group statical comparison** | **Point-estimates and variability** | **Eligibility criteria specified** | **Total** |
| --- | --- | --- | --- | --- | --- | --- | --- | --- | --- | --- | --- | --- |
| Morrison et al. (2013) | 1 | 1 | 1 | 1 | 0 | 1 | 1 | 0 | 1 | 1 | 1 | 9 |
| Ng et al. (2022) | 1 | 1 | 1 | 1 | 0 | 0 | 0 | 1 | 1 | 1 | 1 | 8 |

**Abbreviations:** 0, no point score; 1, one point score; PEDro, Physiotherapy evidence database.

**Table S4.** Axis Scale to evaluate cross-sectional and longitudinal study

| **Study** | **A** | **B** | **C** | **D** | **E** | **F** | **G** | **H** | **I** | **J** | **K** | **L** | **M** | **N** | **Ñ** | **O** | **P** | **Q** | **R** | **S** | **Total** |
| --- | --- | --- | --- | --- | --- | --- | --- | --- | --- | --- | --- | --- | --- | --- | --- | --- | --- | --- | --- | --- | --- |
| Ham et al. (2006) | 1 | 1 | 0 | 0 | 1 | 1 | 0 | 1 | 1 | 0 | 0 | 1 | 0 | 0 | 1 | 1 | 1 | 1 | 0 | 0 | 11 |
| Salmon et al. (2010) | 1 | 1 | 0 | 1 | 1 | 1 | 0 | 1 | 1 | 1 | 1 | 1 | 0 | 0 | 1 | 1 | 1 | 1 | 0 | 1 | 15 |
| Owen et al. (2010) | 1 | 1 | 0 | 1 | 1 | 1 | 0 | 1 | 0 | 0 | 0 | 1 | 0 | 0 | 1 | 1 | 1 | 0 | 0 | 1 | 11 |
| Sirard et al. (2011) | 1 | 1 | 0 | 1 | 1 | 1 | 0 | 1 | 1 | 1 | 1 | 1 | 1 | 0 | 1 | 1 | 1 | 1 | 0 | 0 | 15 |
| Christian et al. (2013) | 1 | 1 | 0 | 1 | 1 | 1 | 0 | 1 | 1 | 1 | 1 | 1 | 0 | 0 | 1 | 1 | 1 | 1 | 0 | 1 | 15 |
| Westgarth et al. (2013) | 1 | 1 | 0 | 1 | 1 | 1 | 0 | 1 | 1 | 1 | 1 | 1 | 0 | 1 | 1 | 1 | 1 | 0 | 0 | 1 | 15 |
| Martin et al. (2014) | 1 | 1 | 1 | 1 | 1 | 1 | 0 | 1 | 1 | 0 | 0 | 1 | 0 | 0 | 1 | 1 | 1 | 1 | 0 | 1 | 14 |
| Christian et al. (2015) | 1 | 1 | 0 | 1 | 1 | 1 | 0 | 1 | 1 | 0 | 0 | 1 | 0 | 0 | 1 | 1 | 1 | 1 | 0 | 0 | 12 |
| Engelberg et al. (2016) | 1 | 1 | 0 | 1 | 1 | 1 | 0 | 1 | 1 | 1 | 1 | 1 | 0 | 0 | 1 | 1 | 1 | 1 | 0 | 0 | 14 |
| Gadomski et al. (2016) | 1 | 1 | 0 | 1 | 1 | 1 | 0 | 1 | 1 | 1 | 0 | 1 | 0 | 0 | 1 | 1 | 1 | 0 | 0 | 1 | 13 |
| Westgarth et al. (2017) | 0 | 1 | 0 | 1 | 1 | 1 | 0 | 1 | 1 | 1 | 0 | 1 | 0 | 0 | 1 | 0 | 1 | 1 | 0 | 1 | 12 |
| Veitch et al. (2019) | 1 | 1 | 1 | 1 | 1 | 1 | 0 | 1 | 1 | 1 | 0 | 1 | 0 | 0 | 1 | 1 | 1 | 1 | 0 | 1 | 15 |
| Westgarth et al. (2019) | 1 | 1 | 0 | 1 | 0 | 0 | 0 | 1 | 1 | 1 | 1 | 1 | 1 | 0 | 1 | 0 | 1 | 1 | 0 | 1 | 13 |
| Christian et al. (2022) | 1 | 1 | 0 | 1 | 1 | 1 | 0 | 1 | 1 | 1 | 1 | 1 | 0 | 1 | 1 | 1 | 1 | 1 | 0 | 1 | 16 |
| Adams et al.  (2024) | 1 | 1 | 1 | 1 | 1 | 1 | 1 | 1 | 1 | 1 | 1 | 1 | 0 | 1 | 1 | 1 | 1 | 1 | 1 | 1 | 19 |

**Abbreviations:** A, were the objectives of the study clear; B, was the study design appropriate for the stated aims; C, was the sample size justified; D, was the target population clearly defined; E, was the sample frame taken from an appropriate population base so that it closely represented the target population under investigation; F, was the selection process likely to select subjects that were representative of the target population under investigation; G, were measures undertaken to address and categorise non-responders; H, were the risk factor and outcome variables measured appropriate to the aims of the study; I, were the risk factor and outcome variables measured correctly using instruments that had been trialled, piloted or published previously; J, Is it clear what was used to determined statistical significance and/or precision estimates ; K, were the methods (including statistical methods) sufficiently described to enable them to be repeated; L, were the basic data adequately described; M, does the response rate raise concerns about non-response bias; N, If appropriate, was information about non-responders described; Ñ, were the results internally consistent; O, were the results for the analyses described in the methods, presented; P, were the authors’ discussions and conclusions justified by the results; Q, were the limitations of the study discussed; R,Were there any funding sources or conflicts of interest that may affect the authors’ interpretation of the results; S, was ethical approval or consent of participants attained; 0, no point score; 1, one point score.

**Table S5.** PRISMA-S checklist.

| **Section and Topic** | **Item #** | **Checklist item** | **Location where item is reported** |
| --- | --- | --- | --- |
| **TITLE** | | |  |
| Title | 1 | Identify the report as a systematic review. | Page 1 |
| **ABSTRACT** | | |  |
| Abstract | 2 | See the PRISMA 2020 for Abstracts checklist. | Page 1 |
| **INTRODUCTION** | | |  |
| Rationale | 3 | Describe the rationale for the review in the context of existing knowledge. | Page 2 |
| Objectives | 4 | Provide an explicit statement of the objective(s) or question(s) the review addresses. | Page 2 |
| **METHODS** | | |  |
| Eligibility criteria | 5 | Specify the inclusion and exclusion criteria for the review and how studies were grouped for the syntheses. | Page 3 |
| Information sources | 6 | Specify all databases, registers, websites, organisations, reference lists and other sources searched or consulted to identify studies. Specify the date when each source was last searched or consulted. | Page 3 |
| Search strategy | 7 | Present the full search strategies for all databases, registers and websites, including any filters and limits used. | Table S1 |
| Selection process | 8 | Specify the methods used to decide whether a study met the inclusion criteria of the review, including how many reviewers screened each record and each report retrieved, whether they worked independently, and if applicable, details of automation tools used in the process. | Page 3 |
| Data collection process | 9 | Specify the methods used to collect data from reports, including how many reviewers collected data from each report, whether they worked independently, any processes for obtaining or confirming data from study investigators, and if applicable, details of automation tools used in the process. | Page 3 |
| Data items | 10a | List and define all outcomes for which data were sought. Specify whether all results that were compatible with each outcome domain in each study were sought (e.g. for all measures, time points, analyses), and if not, the methods used to decide which results to collect. | Page 4 |
| 10b | List and define all other variables for which data were sought (e.g. participant and intervention characteristics, funding sources). Describe any assumptions made about any missing or unclear information. | Page 4 |
| Study risk of bias assessment | 11 | Specify the methods used to assess risk of bias in the included studies, including details of the tool(s) used, how many reviewers assessed each study and whether they worked independently, and if applicable, details of automation tools used in the process. | Page 4 |
| Effect measures | 12 | Specify for each outcome the effect measure(s) (e.g. risk ratio, mean difference) used in the synthesis or presentation of results. | Page 4 |
| Synthesis methods | 13a | Describe the processes used to decide which studies were eligible for each synthesis (e.g. tabulating the study intervention characteristics and comparing against the planned groups for each synthesis (item #5)). | Page 4 |
| 13b | Describe any methods required to prepare the data for presentation or synthesis, such as handling of missing summary statistics, or data conversions. | Page 4 |
| 13c | Describe any methods used to tabulate or visually display results of individual studies and syntheses. | Page 4 |
| 13d | Describe any methods used to synthesize results and provide a rationale for the choice(s). If meta-analysis was performed, describe the model(s), method(s) to identify the presence and extent of statistical heterogeneity, and software package(s) used. | Table 1 |
| 13e | Describe any methods used to explore possible causes of heterogeneity among study results (e.g. subgroup analysis, meta-regression). | none |
| 13f | Describe any sensitivity analyses conducted to assess robustness of the synthesized results. | none |
| Reporting bias assessment | 14 | Describe any methods used to assess risk of bias due to missing results in a synthesis (arising from reporting biases). | none |
| Certainty assessment | 15 | Describe any methods used to assess certainty (or confidence) in the body of evidence for an outcome. | Page 5 |
| **RESULTS** | | |  |
| Study selection | 16a | Describe the results of the search and selection process, from the number of records identified in the search to the number of studies included in the review, ideally using a flow diagram. | Page 5 |
| 16b | Cite studies that might appear to meet the inclusion criteria, but which were excluded, and explain why they were excluded. | Table S1 |
| Study characteristics | 17 | Cite each included study and present its characteristics. | Table 1 |
| Risk of bias in studies | 18 | Present assessments of risk of bias for each included study. | none |
| Results of individual studies | 19 | For all outcomes, present, for each study: (a) summary statistics for each group (where appropriate) and (b) an effect estimate and its precision (e.g. confidence/credible interval), ideally using structured tables or plots. | Table S2 |
| Results of syntheses | 20a | For each synthesis, briefly summarise the characteristics and risk of bias among contributing studies. | none |
| 20b | Present results of all statistical syntheses conducted. If meta-analysis was done, present for each the summary estimate and its precision (e.g. confidence/credible interval) and measures of statistical heterogeneity. If comparing groups, describe the direction of the effect. | Supplementary material |
| 20c | Present results of all investigations of possible causes of heterogeneity among study results. | none |
| 20d | Present results of all sensitivity analyses conducted to assess the robustness of the synthesized results. | Page 11 |
| Reporting biases | 21 | Present assessments of risk of bias due to missing results (arising from reporting biases) for each synthesis assessed. | none |
| Certainty of evidence | 22 | Present assessments of certainty (or confidence) in the body of evidence for each outcome assessed. | none |
| **DISCUSSION** | | |  |
| Discussion | 23a | Provide a general interpretation of the results in the context of other evidence. | Page 12 |
| 23b | Discuss any limitations of the evidence included in the review. | Page 12 |
| 23c | Discuss any limitations of the review processes used. | Page 13 |
| 23d | Discuss implications of the results for practice, policy, and future research. | Page 13 |
| **OTHER INFORMATION** | | |  |
| Registration and protocol | 24a | Provide registration information for the review, including register name and registration number, or state that the review was not registered. | Page 1 |
| 24b | Indicate where the review protocol can be accessed, or state that a protocol was not prepared. | Page 2 |
| 24c | Describe and explain any amendments to information provided at registration or in the protocol. | none |
| Support | 25 | Describe sources of financial or non-financial support for the review, and the role of the funders or sponsors in the review. | Page 14 |
| Competing interests | 26 | Declare any competing interests of review authors. | Page 14 |
| Availability of data, code and other materials | 27 | Report which of the following are publicly available and where they can be found: template data collection forms; data extracted from included studies; data used for all analyses; analytic code; any other materials used in the review. | Supplementary material |

**Table S6.** Excluded studies with reasons for exclusion.

| **Study** | **Reason for exclusion** |
| --- | --- |
| Coci, M., Saunders, J., & Christian, H. (2021). Barriers and motivators for preschoolers playing and walking with their dog: Results from qualitative research. doi: 10.1002/hpja.483 | Interview |
| Adkins, J., Mulé, C., Linder, D., Must, A., Cash, S., & Folta, S. (2023). Exploring health behaviors and the role of pet dogs in households with autistic children: the DANE study. doi: 10.3389/fped.2023.1153124 | Interview |
| Mathers, M., Canterford, L., Olds, T., Waters, E., & Wake, M. (2010). Pet ownership and adolescent health: cross-sectional population study. doi: 10.1111/j.1440-1754.2010.01830.x | Includes other animals |
| Miles, J., Parast, L., Babey, S., Griffin, B., & Sunders, J. (2017). A Propensity-Score-Weighted Population-Based Study of the Health Benefits of Dogs and Cats for Children. https://doi.org/10.1080/08927936.2017.1335103 | Includes other animals |
| Yin, L., Solomon, O., & Deavenport- Saman, A. (2024). A Health-literacy Module for Overweight Adolescents and Their Parents on Canine Physical Activity, Nutrition and Behavior: Enhancing Department of Health and Human Services' (DHHS) BodyWorks Program at a Federally Qualified Health Center. | On course |
| MacDonald, M. (2024). Development and Evaluation of a Novel Imitation-based Dog Assisted Intervention, 'DIAD Training', to Increase Joint Activity and Social Wellbeing for Adolescents With Developmental Disabilities. | On course |
| Westgarth, C., Knuiman, M., & Christian, H. (2016). Understanding how dogs encourage and motivate walking: cross-sectional findings from RESIDE. doi: 10.1186/s12889-016-3660-2 | Adults |
| Soares, J., Epping, J., Owens, C., Brown, D., Lankford, T., Simoes, E., & Caspersen, C. (2013). Odds of Getting Adequate Physical Activity by Dog Walking. doi: 10.1123/jpah.2013-0229. | Adults |
| Brown, B., & Jensen, W. (2020). Dog ownership and walking: Perceived and audited walkability and activity correlates. doi: 10.3390/ijerph17041385 | Adults |
| Taniguchi, Y., Ikeuchi, T., Grabka, M., & Yong, J. (2024). Investigation of dog ownership and physical activity on weekdays and weekends using longitudinal data from the SOEP Cohort. doi: 10.1038/s41598-024-77231-x | Adults |
| Roberts JD, Rodkey L, Grisham C, Ray R. The Influence of Family Dog Ownership and Parental Perceived Built Environment Measures on Children's Physical Activity within the Washington, DC Area. Int J Environ Res Public Health. 2017 Nov 16;14(11):1398. doi: 10.3390/ijerph14111398. PMID: 29144433; PMCID: PMC5708037. | Study not congruent with our research objective |
| Westgarth C, Boddy LM, Stratton G, German AJ, Gaskell RM, Coyne KP, Bundred P, McCune S, Dawson S. The association between dog ownership or dog walking and fitness or weight status in childhood. Pediatr Obes. 2017 Dec;12(6):e51-e56. doi: 10.1111/ijpo.12176. Epub 2016 Oct 28. PMID: 27793067; PMCID: PMC5697616. | Study not congruent with our research objective |
| Timperio, A., Salmon, J., Chu, B., & Andrianopoulos, N. Is dog ownership or dog walking associated with weight status in children and their parents? Health Promot J Austr. 2008 Apr;19(1):60-3. doi: 10.1071/he08060. PMID: 18481934. | Study not congruent with our research objective |
| Collen, C., Bukart, S., & Potter, K. the KID study (kids interacting with dogs): Piloting a novel approach for measuring dog-facilitated youth physical activity. doi: doi.org/10.1123/jmpb.2023-0014. | Full-text not available |
